# Supplementary material for: Development of a High-Throughput Assay for Identifying Inhibitors of TBK1 and IKKε
Source: PubMed Central journal article supplement (PMC3408500; doi:10.1371/journal.pone.0041494), 2012-07-30
Supplement: pone.0041494.s001.pdf [file pone.0041494.s001.pdf]

# Hutti, et al. Figure S1

|   | -5   | -4   | -3   | -2   | -1   | +1   | +2   | +3   | +4   |
|---|------|------|------|------|------|------|------|------|------|
| P | 0.96 | 1.15 | 1.16 | 1.99 | 1.29 | 0.08 | 0.63 | 0.80 | 0.50 |
| G | 0.92 | 1.06 | 1.42 | 0.54 | 0.56 | 0.50 | 0.88 | 0.72 | 0.62 |
| A | 0.97 | 0.61 | 0.70 | 0.52 | 0.82 | 0.25 | 0.83 | 0.59 | 0.86 |
| C | 0.72 | 0.78 | 0.46 | 0.51 | 0.58 | 0.36 | 0.63 | 0.74 | 0.77 |
| S | 3.33 | 2.22 | 3.00 | 2.49 | 1.06 | 1.46 | 1.63 | 1.43 | 0.79 |
| T | 1.10 | 1.18 | 1.00 | 0.73 | 1.11 | 0.49 | 1.43 | 0.76 | 0.98 |
| V | 0.78 | 0.66 | 0.41 | 0.55 | 0.71 | 1.14 | 1.40 | 0.77 | 1.16 |
| I | 0.73 | 0.84 | 0.24 | 0.31 | 0.70 | 2.43 | 1.35 | 1.08 | 1.22 |
| L | 0.82 | 0.85 | 0.65 | 0.97 | 0.98 | 3.72 | 1.22 | 1.19 | 1.26 |
| M | 0.61 | 0.91 | 0.99 | 1.39 | 1.51 | 2.80 | 1.39 | 1.06 | 1.15 |
| F | 0.87 | 0.92 | 0.78 | 2.12 | 1.10 | 2.74 | 1.35 | 2.03 | 1.55 |
| Y | 1.06 | 1.07 | 0.81 | 2.30 | 1.19 | 1.35 | 1.11 | 2.40 | 1.69 |
| W | 0.93 | 1.06 | 0.50 | 0.65 | 1.01 | 1.55 | 0.91 | 2.31 | 1.61 |
| H | 0.78 | 0.89 | 0.97 | 1.10 | 1.69 | 0.15 | 0.87 | 1.12 | 1.12 |
| K | 0.86 | 1.29 | 1.07 | 0.37 | 1.27 | 0.14 | 0.38 | 0.25 | 0.62 |
| R | 1.27 | 1.29 | 1.19 | 0.61 | 1.21 | 0.20 | 0.73 | 0.40 | 0.78 |
| Q | 1.08 | 1.21 | 1.40 | 0.92 | 0.74 | 0.17 | 0.99 | 0.62 | 0.80 |
| N | 0.74 | 0.68 | 1.12 | 0.48 | 0.98 | 0.26 | 0.91 | 0.66 | 0.91 |
| D | 0.77 | 0.64 | 0.98 | 0.81 | 0.78 | 0.13 | 0.81 | 0.43 | 0.79 |
| E | 0.72 | 0.70 | 1.15 | 0.65 | 0.73 | 0.10 | 0.57 | 0.64 | 0.82 |
