# Supplementary material for: Development of a High-Throughput Assay for Identifying Inhibitors of TBK1 and IKKε
Source: PubMed Central journal article supplement (PMC3408500; doi:10.1371/journal.pone.0041494), 2012-07-30

A)

TBK1 inhibition by the LOPAC library

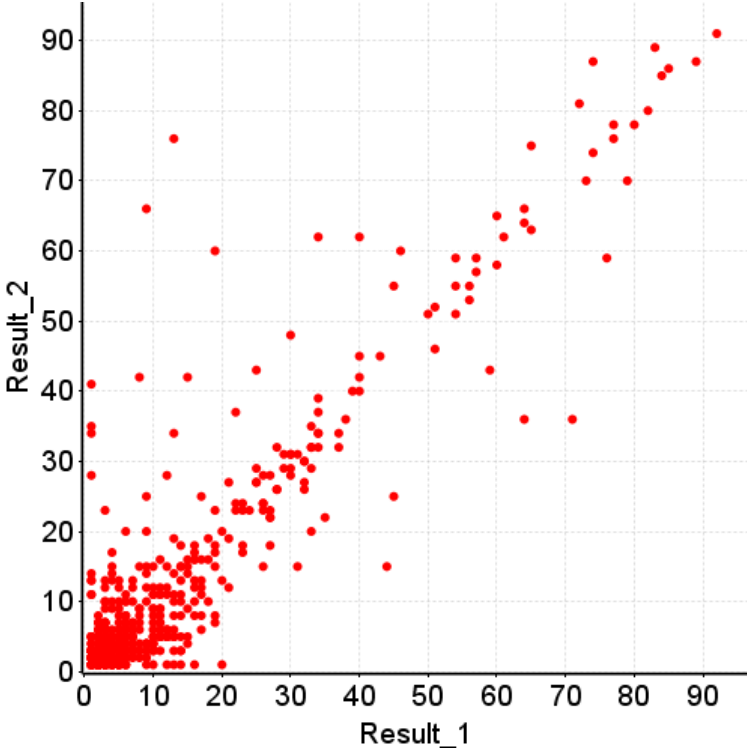

B)

IKKε inhibition by the LOPAC library

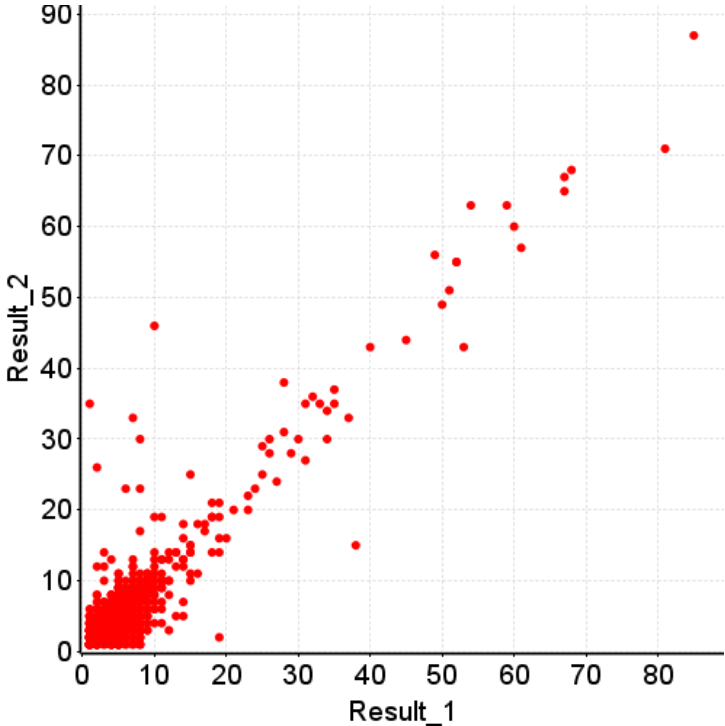

Supplement: pone.0041494.s002.pdf [file pone.0041494.s002.pdf]
