# Supplementary material for: Development of a High-Throughput Assay for Identifying Inhibitors of TBK1 and IKKε
Source: PubMed Central journal article supplement (PMC3408500; doi:10.1371/journal.pone.0041494), 2012-07-30
Supplement: pone.0041494.s003.pdf [file pone.0041494.s003.pdf]

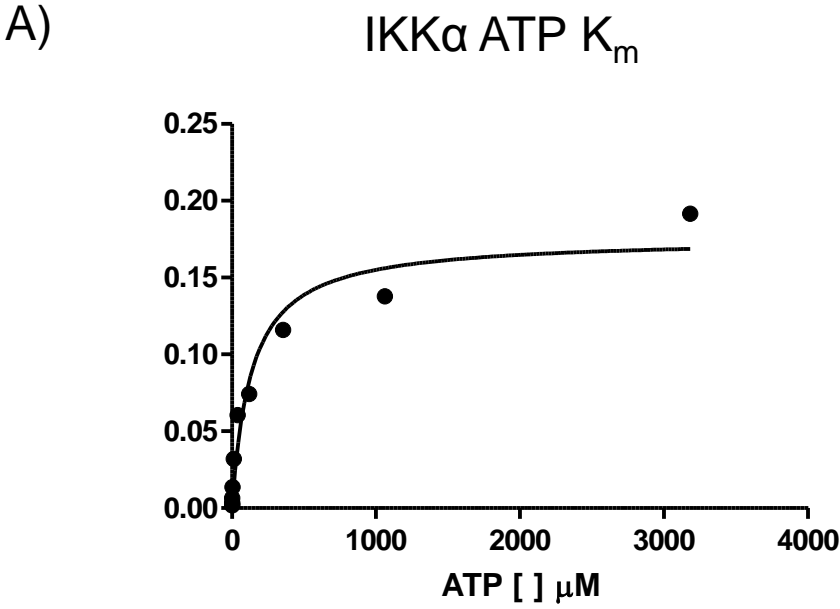

|                  |        |
|------------------|--------|
| Michaelis-Menten |        |
| Best-fit values  |        |
| Vmax             | 0.1758 |
| Km               | 133.7  |

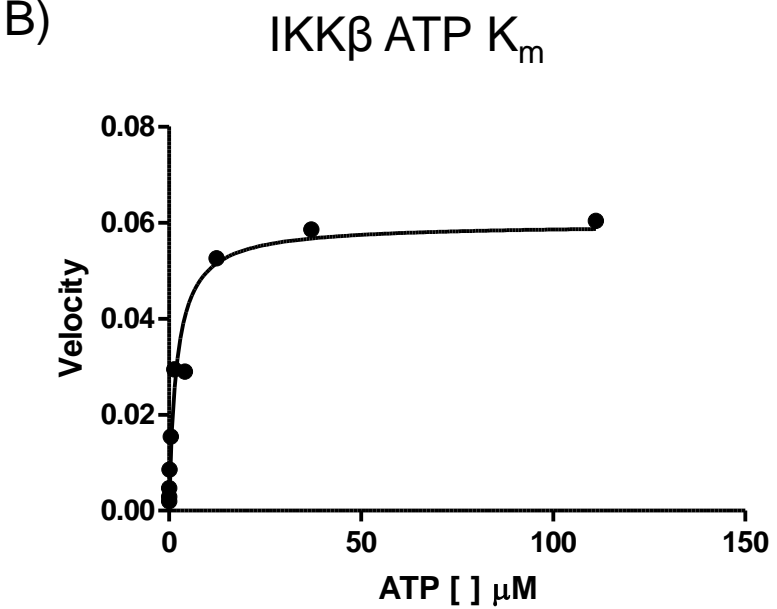

|                  |         |
|------------------|---------|
| Michaelis-Menten |         |
| Best-fit values  |         |
| Vmax             | 0.05972 |
| Km               | 1.981   |
